# Supplementary material for: Mfn2 is critical for brown adipose tissue thermogenic function
Source: PubMed Central journal article supplement — EMBO J. 2017 Mar 27;36(11):1543–58. doi: 10.15252/embj.201694914 (PMC5452040; doi:10.15252/embj.201694914), 2017-03-27
Supplement: EMBJ-36-1543-s001.pdf [file EMBJ-36-1543-s001.pdf]

## **Mfn2 is critical for brown adipose tissue thermogenic function**

Marie Boutant, Sameer S Kulkarni, Magali Joffraud, Joanna Ratajczak, Miriam Valera-Alberni, Roy Combe, Antonio Zorzano and Carles Cantó

### **Online Appendix:**

#### **Table of contents:**

- **Supplemental Table 1: Primers sequences for qPCR analyses**

## Supplemental Table S1

| gene                      | sequence                   |
|---------------------------|----------------------------|
| <i>b-2-microglobuline</i> | F ATGGGAAGCCGAACATACTG     |
|                           | R CAGTCTCAGTGGGGTGAAT      |
| <i>cyclophilin</i>        | F CAGGGGAGATGGCACAGGAG     |
|                           | R CGGCTGTCTGTCTTGGTCTCTCC  |
| <i>Mfn2</i>               | F ACGTCAAAGGGTACCTGTCCA    |
|                           | R CAATCCCAGATGGCAGAAGCTT   |
| <i>Mfn1</i>               | F AGGGGACCGATGGAGATAAAG    |
|                           | R AAGAGGGCACATTTTGCCTTG    |
| <i>ucp1</i>               | F CTTTGCTCAGTCAAGGATTGG    |
|                           | R ACTGCCACACCTCCAGTCAAT    |
| <i>cidea</i>              | F TGCTCTTCTGTATCGCCAGT     |
|                           | R GCCGTGTTAAGGAATCTGCTG    |
| <i>prdm16</i>             | F TGGCCTTCATCACCTCTCTGAA   |
|                           | R TTTCTGATCCACGGCTCCTGTGA  |
| <i>Dio2</i>               | F AGAGTGGAGGCGCATGCT       |
|                           | R GGCATCTAGGAGGAAGCTGTTC   |
| <i>pparg</i>              | F ATGGGTGAAACTCTGGGAGATTCT |
|                           | R CTTGGAGCTTCAGGTCAATTTGTA |
| <i>ACC1</i>               | F GACAGACTGATCGCAGAGAAAG   |
|                           | R TGGAGAGCCCCACACACA       |
| <i>ACC2</i>               | F CCCAGCCGAGTTTGTCACT      |
|                           | R GGGCATGAGCACCTTCTCTA     |
| <i>FAS</i>                | F TTCCAAGACGAAAATGATGC     |
|                           | R AATTGTGGGATCAGGAGAGC     |
| <i>mcad</i>               | F GGCCATTAAGACCAAGCAGA     |
|                           | R GTGTCGGCTTCCACAATGAAT    |
| <i>lcad</i>               | F GTAGCTTATGAATGTGTGCAACTC |
|                           | R GTCTTGCGATCAGCTCTTTCATTA |
| <i>cpt1</i>               | F CCCATGTGCTCCTACCAGAT     |
|                           | R CCTTGAAGAAGCGACCTTTG     |
| <i>cpt2</i>               | F AGCCAGTTCAGGAAGACAGA     |
|                           | R GACAGAGTCTCGAGCAGTTA     |
| <i>ACO</i>                | F ACCGCCTATGCCCTCCACTTTC   |
|                           | R GCAAGCCATCCGACATTCTTCG   |
| <i>ppara</i>              | F AGGAAGCCGTTCTGTGACAT     |
|                           | R TTGAAGGAGCTTTGGGAAGA     |

|                     |                               |
|---------------------|-------------------------------|
| <i>NduFa2</i>       | F GCACACATTTCCCACACTG         |
|                     | R CCCAACCTGCCATTCTGAT         |
| <i>ATG5g1</i>       | F GCTGCTTGAGAGATGGGTTTC       |
|                     | R AGTTGGTGTGGCTGGATCA         |
| <i>cytochrome c</i> | F TCCATCAGGGTATCCTCTCC        |
|                     | R GGAGGCAAGCATAAGACTGG        |
| <i>SDHb</i>         | F GGACCTATGGTGTGGATGC         |
|                     | R GTGTGCACGCCAGAGATTG         |
| <i>HK I</i>         | F CGGAATGGGGAGCCTTTGG         |
|                     | R GCCTTCCTTATCCGTTTCAATGG     |
| <i>HIF1a</i>        | F ACCTTCATCGGAACTCCAAAG       |
|                     | R CTGTTAGGCTGGGAAAAGTTAGG     |
| <i>GK</i>           | F CCT GGG CTT CAC CTT CTC CTT |
|                     | R GAG GCC TTG AAG CCC TTG GT  |
| <i>L-PK</i>         | F GGGCCGCATCTACATTGAC         |
|                     | R GTCCCTCTGGGCCAATTTT         |
| <i>G6Pase</i>       | F CCGGATCTACCTTGTCTCACTTT     |
|                     | R TAGCAGGTAGAATCCAAGCGGAAAC   |
| <i>PEPCK</i>        | F CCACAGCTGTGAGAAACA          |
|                     | R GAAGGGTCGCATGGCAA           |
| <i>IL1</i>          | F GCAACTGTTCTGAACTCAACT       |
|                     | R ATCTTTTGGGGTCCGTCAACT       |
| <i>TNFa</i>         | F GGATTATGGCTCAGGGTCCA        |
|                     | R ACATTGAGGCTCCAGTGAA         |
| <i>HGF</i>          | F TCAAGGCCAAGGAGAAGGTT        |
|                     | R ACTCGGATGTTTGGGTCAGT        |
| <i>ATF4</i>         | F CCTGAACAGCGAAGTGTGG         |
|                     | R TGGAGAACCATGAGGTTTCAA       |
| <i>AFT6</i>         | F AACCGAGAGTCTGCTTGCA         |
|                     | R AGCCTCTGGTTCTCTGACAC        |
| <i>Bip</i>          | F GACTGCTGAGGCGTATTTGG        |
|                     | R AGCATCTTTGGTTGCTTGTCG       |
| <i>xbp1</i>         | F AGCAGCAAGTGGTGGATTGG        |
|                     | R GAGTTTTCTCCGTAAGGCTGA       |
| <i>FGF21</i>        | F CCTCTAGGTTTCTTTGCCAAC       |
|                     | R CTGGTACACATTGTAACCGTC       |

**Table S1: Primers sequences for qPCR analyses.**
